# Supplementary material
Source: ML conference proceedings conference paper supplement (https://openaccess.thecvf.com/content/ICCV2021/html/Mazur_Cloud_Transformers_A_ICCV_2021_paper.html)
Supplement: Supplementary file 2 [file Mazur_Cloud_Transformers_A_ICCV_2021_supplemental.zip]

Archive with 4 entries (4 files):
- ICCV_Cloud_Transformers_supmat_small.mp4
- __MACOSX/._ICCV_Cloud_Transformers_supmat_small.mp4
- ICCV_CloudTransformers_supmat_text.pdf
- __MACOSX/._ICCV_CloudTransformers_supmat_text.pdf
